# Supplementary material
Source: publisher figshare collection journal article supplement (https://gsapubs.figshare.com/ndownloader/files/23317655)
Supplement: Supplementary file 1 [file 23317655]

## Sheet: Table DR6
TABLE DR6. CRYSTAL-SIZE DISTRIBUTION PATTERNS FOR PLAGIOCLASE AND THEIR CALCULATED RESIDENCE TIMES
Dome	Sample	Comment	R2	Intercept	Slope	Residence time (years) using a growth rate of 10-11 (mm/s)	Residence time (years) using a growth rate of 10-10 (mm/s)	Residence time (days) using a growth rate of 10-9 (mm/s)	Residence time (days) using a growth rate of 10-8 (mm/s)
db1	B15DD025	Entire curve	0.911	10.763	-20.48	154.727	15.4727	565.14	56.514
		S1 curve	0.9739	11.726	-30.395	104.254	10.4254	380.789	38.0789
		S3 curve	0.93	2.4	-4.6	689	69	2516	252
	LC98-2321	Entire curve	0.9564	11.228	-25.411	124.702	12.4702	455.475	45.5475
		S1 curve	0.9638	11.693	-30.695	103.235	10.3235	377.067	37.7067
		S3 curve	---	---	---	---	---	---	---
db2	B15DD029	Entire curve	0.9732	12.495	-33.697	94.0383	9.40383	343.475	34.3475
		S1 curve	0.9732	12.495	-33.697	94.0383	9.40383	343.475	34.3475
		S3 curve	---	---	---	---	---	---	---
	B16DD066	Entire curve	0.9262	11.86	-25.287	125.314	12.5314	457.708	45.7708
		S1 curve	0.9423	12.474	-32.357	97.9327	9.79327	357.699	35.7699
		S3 curve	---	---	---	---	---	---	---
db3	B15DD027	Entire curve	0.9254	11.614	-24.233	130.764	13.0764	477.616	47.7616
		S1 curve	0.9426	12.189	-30.72	103.151	10.3151	376.76	37.676
		S3 curve	---	---	---	---	---	---	---
db4	B16DD067	Entire curve	0.8651	10.347	-17.195	184.287	18.4287	673.107	67.3107
		S2 curve	0.9915	13.701	-72.935	43.447	4.3447	158.69	15.869
		S3 curve	0.9772	7.2492	-11.581	273.621	27.3621	999.402	99.9402
db5	B16DD063	Entire curve	0.8976	9.434	-15.472	204.809	20.4809	748.066	74.8066
		S2 curve	0.9441	12.23	-65.588	48.3138	4.83138	176.466	17.6466
		S3 curve	0.992	7.287	-11.55	274.356	27.4356	1002.08	100.208
db6	B16DD060A	Entire curve	0.8322	9.1015	-12.84	246.792	24.6792	901.408	90.1408
		S2 curve	0.9504	13.022	-79.701	39.7587	3.97587	145.219	14.5219
		S3 curve	0.98	6.3408	-8.771	361.282	36.1282	1319.58	131.958
	B16DD060B	Entire curve	0.8125	9.8425	-15.501	204.426	20.4426	746.666	74.6666
		S2 curve	0.9519	13.785	-85.085	37.2429	3.72429	136.03	13.603
		S3 curve	0.9803	6.6878	-9.7489	325.043	32.5043	1187.22	118.722
	B16DD060C	Entire curve	0.8913	10.002	-16.986	186.554	18.6554	681.389	68.1389
		S2 curve	0.9579	13.026	-69.082	45.8703	4.58703	167.541	16.7541
		S3 curve	0.9839	7.4299	-12.31	257.417	25.7417	940.217	94.0217
	B16DD061A	Entire curve	0.8949	9.3912	-15.145	209.231	20.9231	764.218	76.4218
		S2 curve	0.9589	12.05	-61.042	51.9119	5.19119	189.608	18.9608
		S3 curve	0.986	7.1421	-11.054	286.666	28.6666	1047.05	104.705
Note: Each sample displays the R2, intercept, and slope for the entire curve and the S1, S2, and/or S3 curves. Most of the samples contain multiple curves, although to be considered a line segment valid for calculating a residence time the line must contain three or more coordinates (of population density versus size) from Table DR5. Curves that do not fall into this criteria contain the symbol -…
